# Supplementary material for: Discovery of Novel Agents on Spindle Assembly Checkpoint to Sensitize Vinorelbine-Induced Mitotic Cell Death against Human Non-Small Cell Lung Cancers
Source: MDPI journal article supplement (doi:10.3390/ijms21165608), 2020-08-05
Supplement: s1 [file s1]

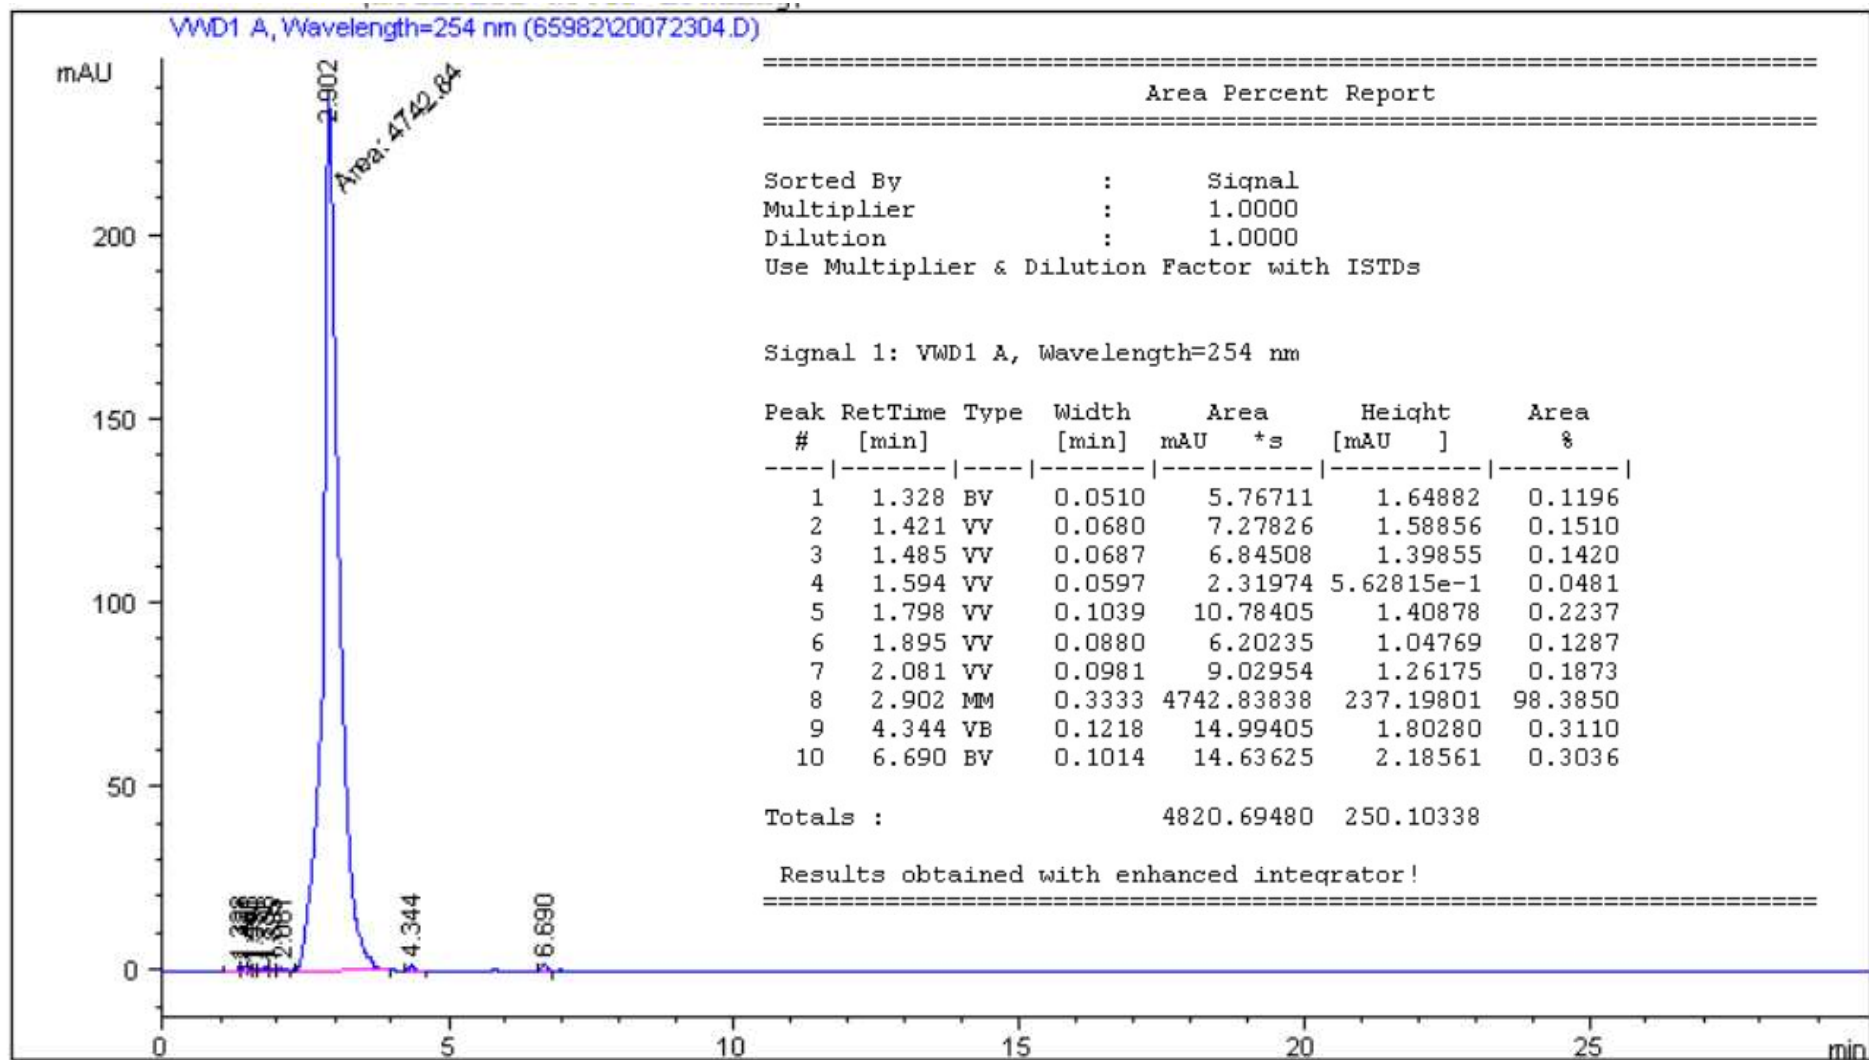

## HPLC analysis of YL-9

Column: Agilent ZORBAX Eclipse XDB-C8, 80Å, 4.6 x 150 mm, 5 µm.

Eluent: 60% acetonitrile and 40% water

Flow rate: 1 mL/min

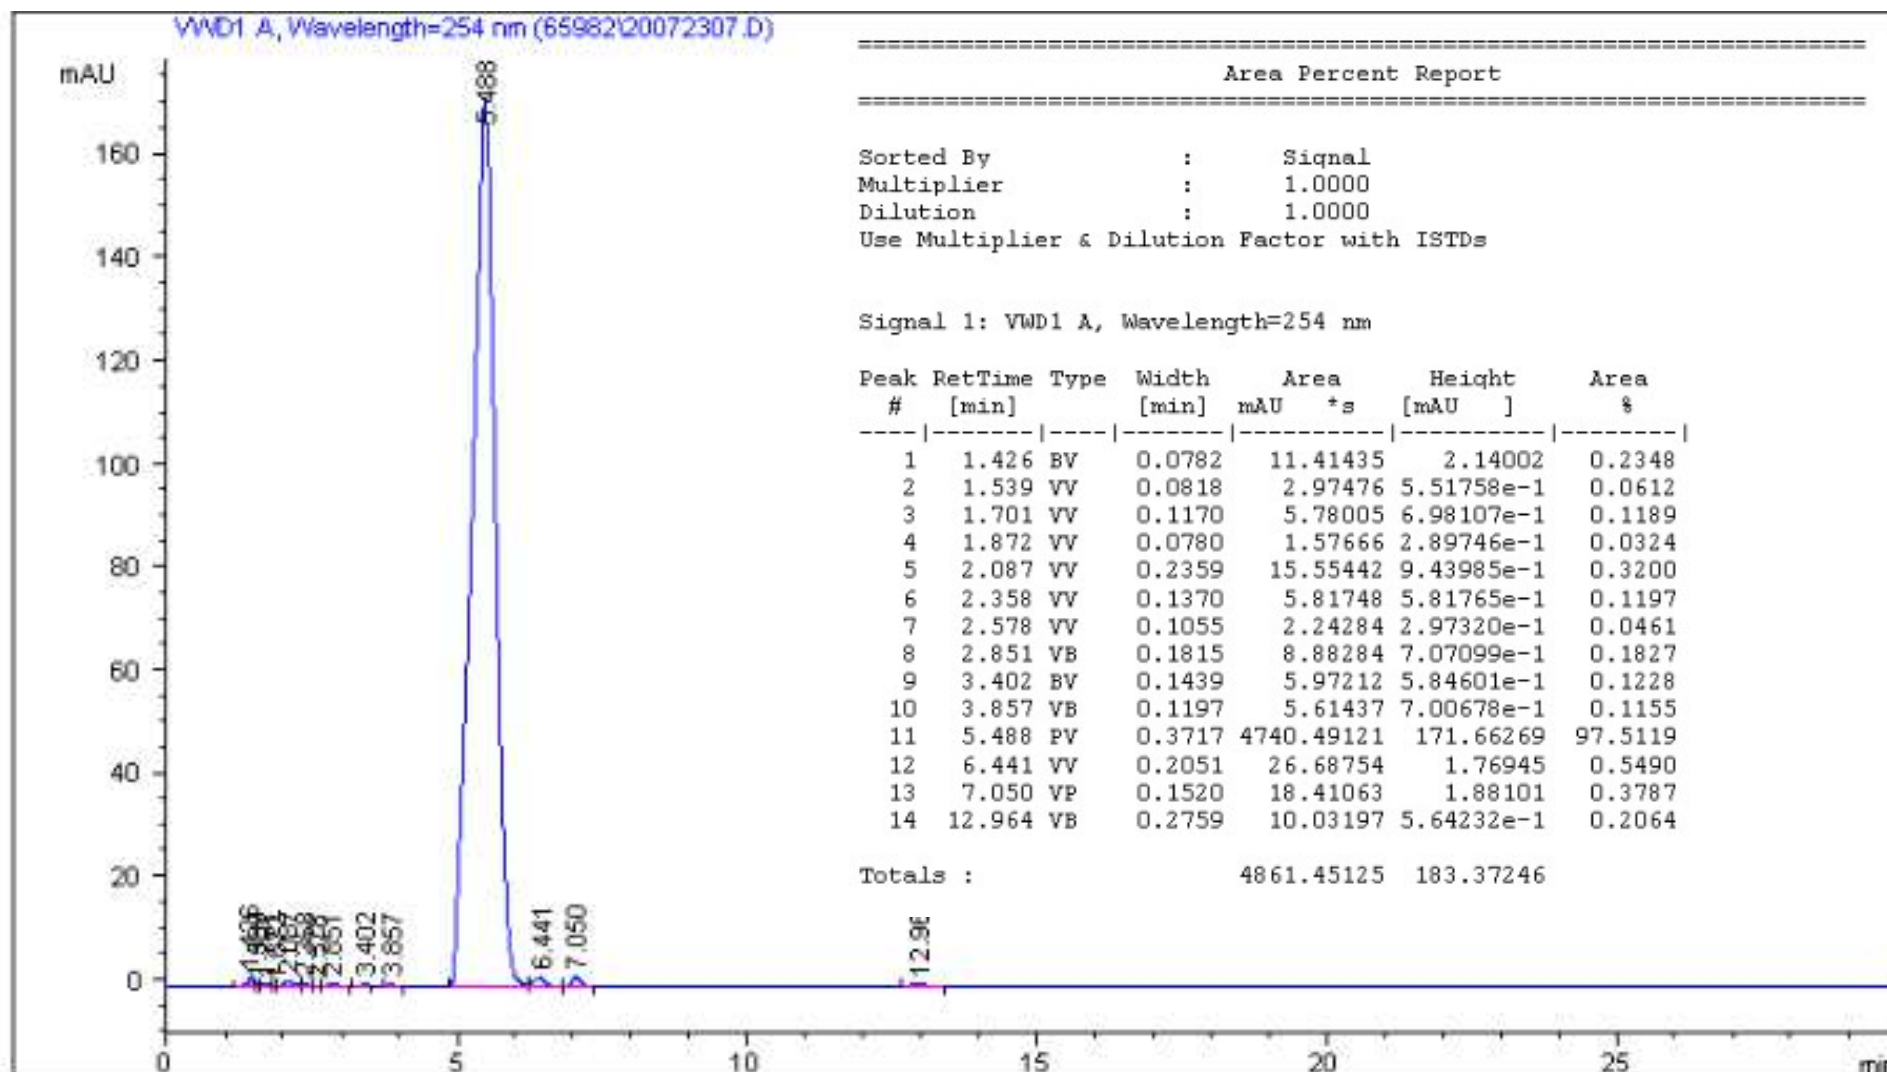

## HPLC analysis of YL-9

Column: Agilent ZORBAX Eclipse XDB-C8, 80Å, 4.6 x 150 mm, 5 µm.

Eluent: 40% acetonitrile and 60% water

Flow rate: 1 mL/min
