# Supplementary material for: Discovery of Novel Agents on Spindle Assembly Checkpoint to Sensitize Vinorelbine-Induced Mitotic Cell Death against Human Non-Small Cell Lung Cancers
Source: MDPI journal article supplement (doi:10.3390/ijms21165608), 2020-08-05
Supplement: s1 [file s1]

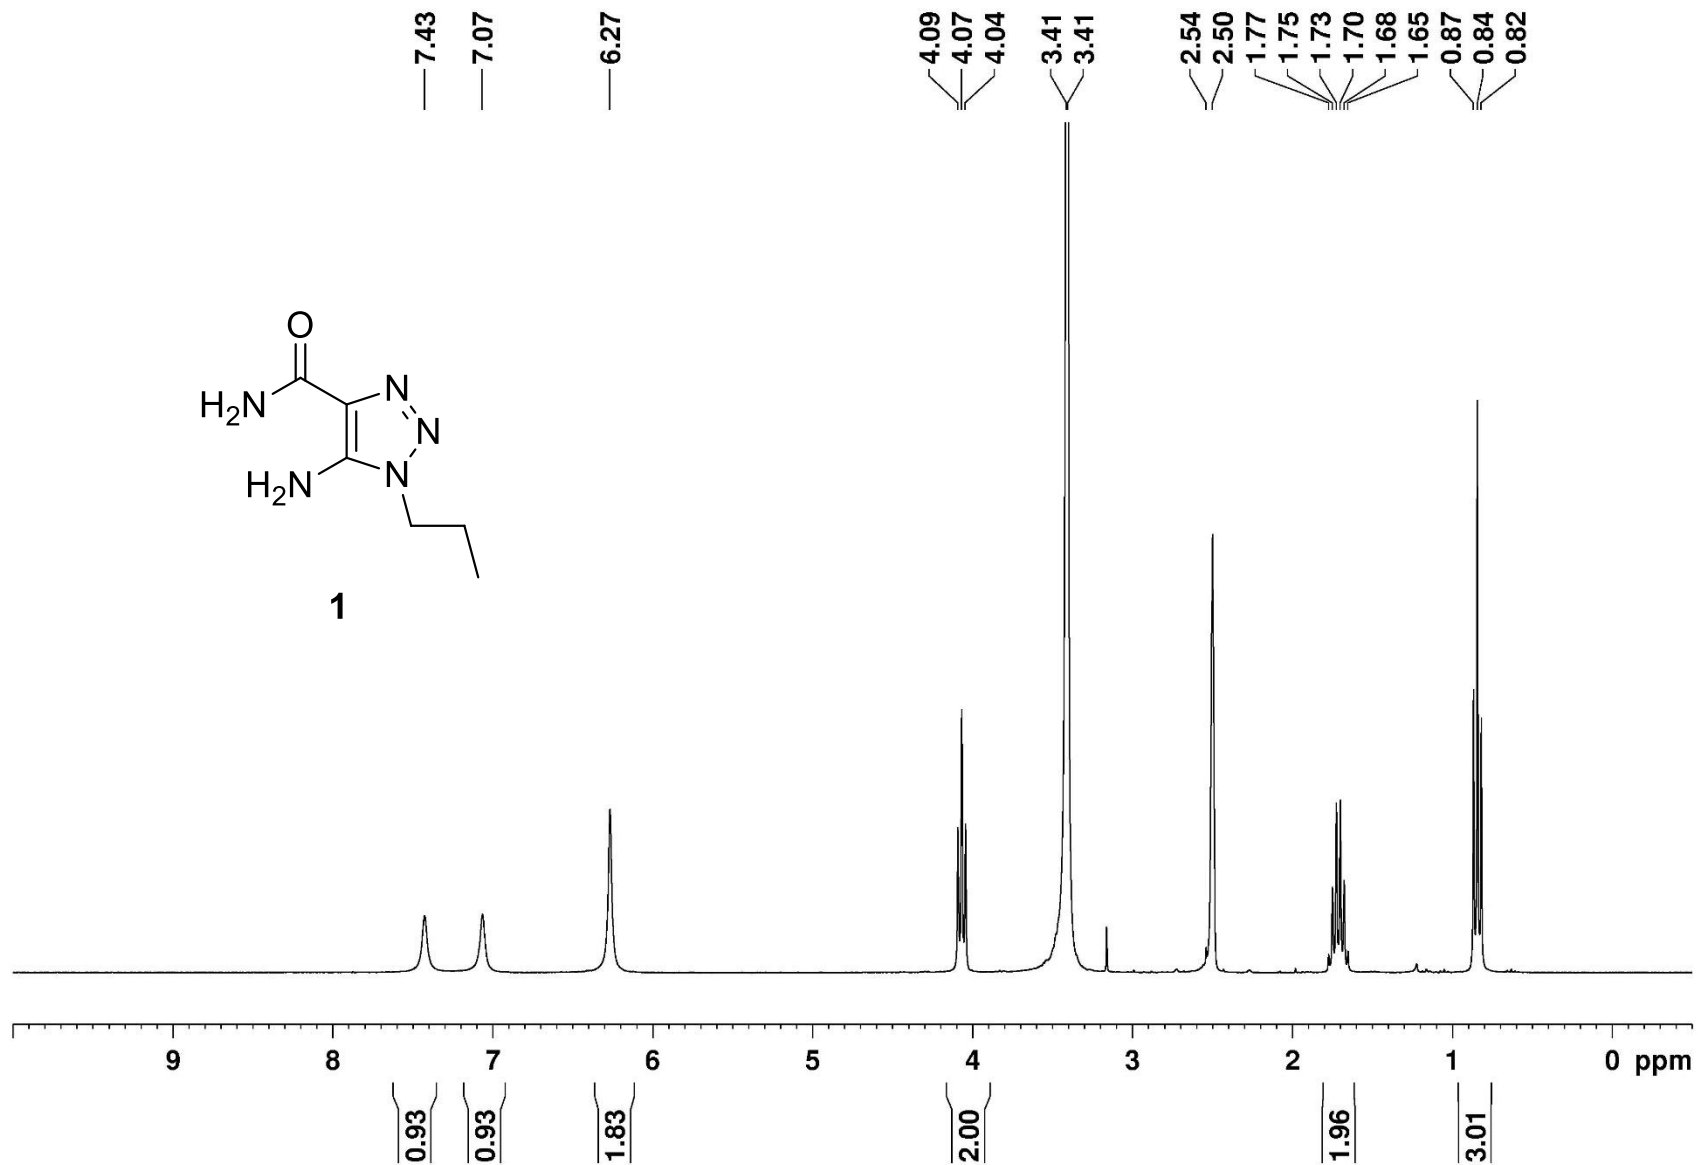

$^1\text{H}$  NMR of compound **1** (300 MHz DMSO- $d_6$ )

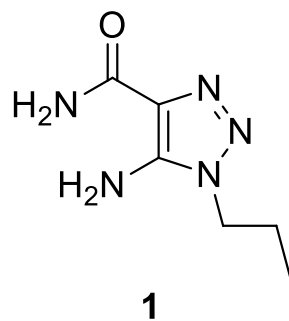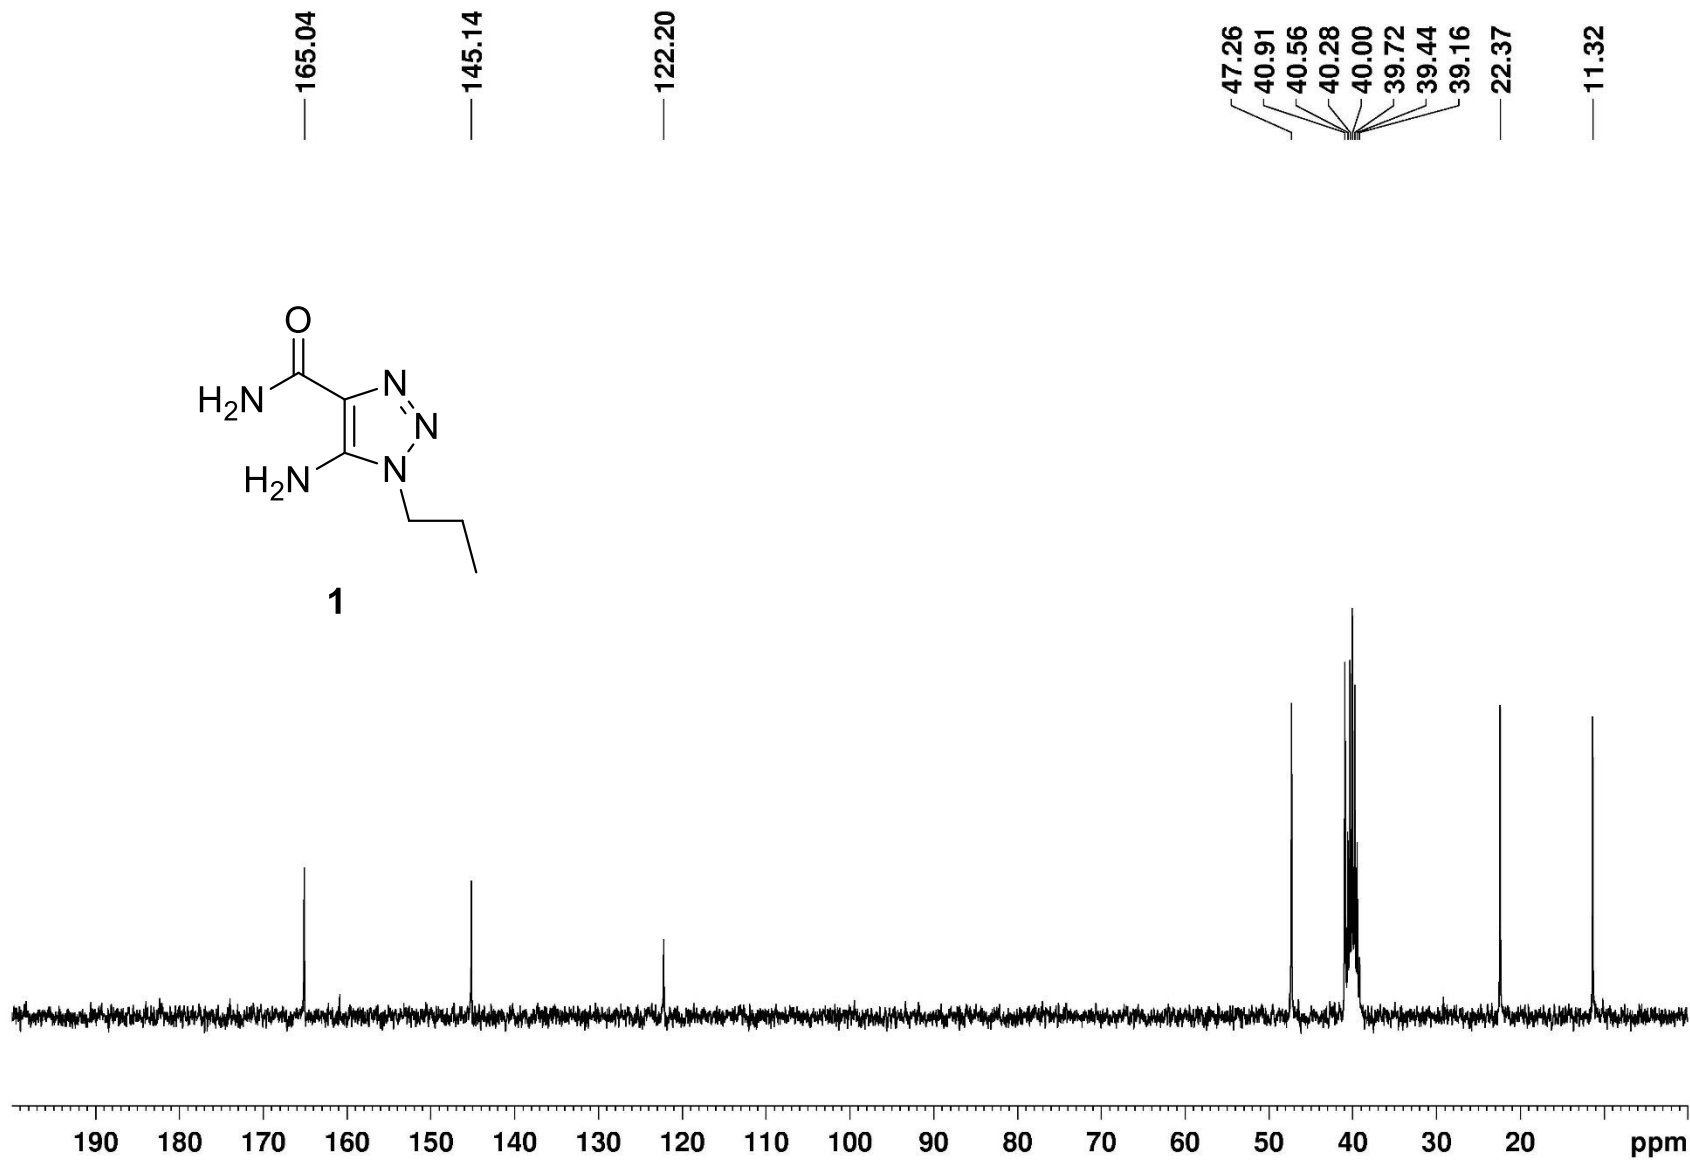

$^{13}\text{C}\{^1\text{H}\}$  NMR of compound **1** (75 MHz, DMSO- $d_6$ )

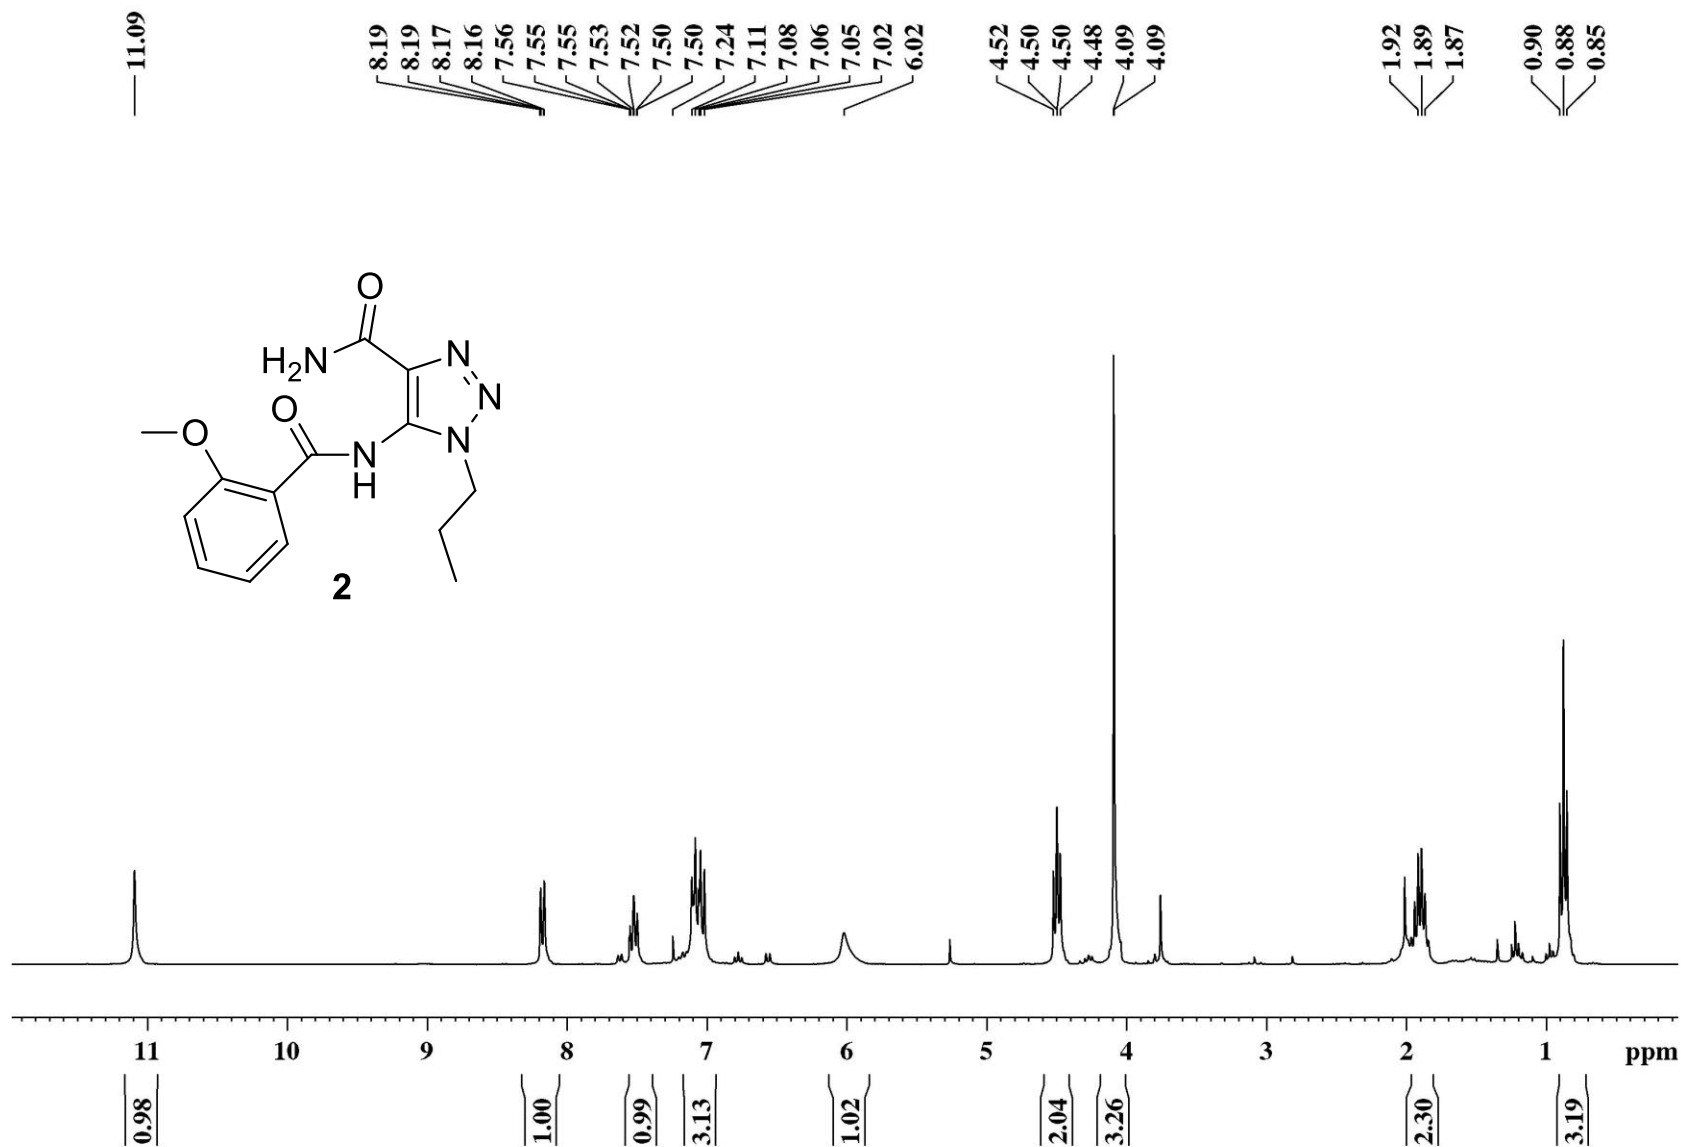

<sup>1</sup>H NMR of compound **2** (300 MHz CDCl<sub>3</sub>)

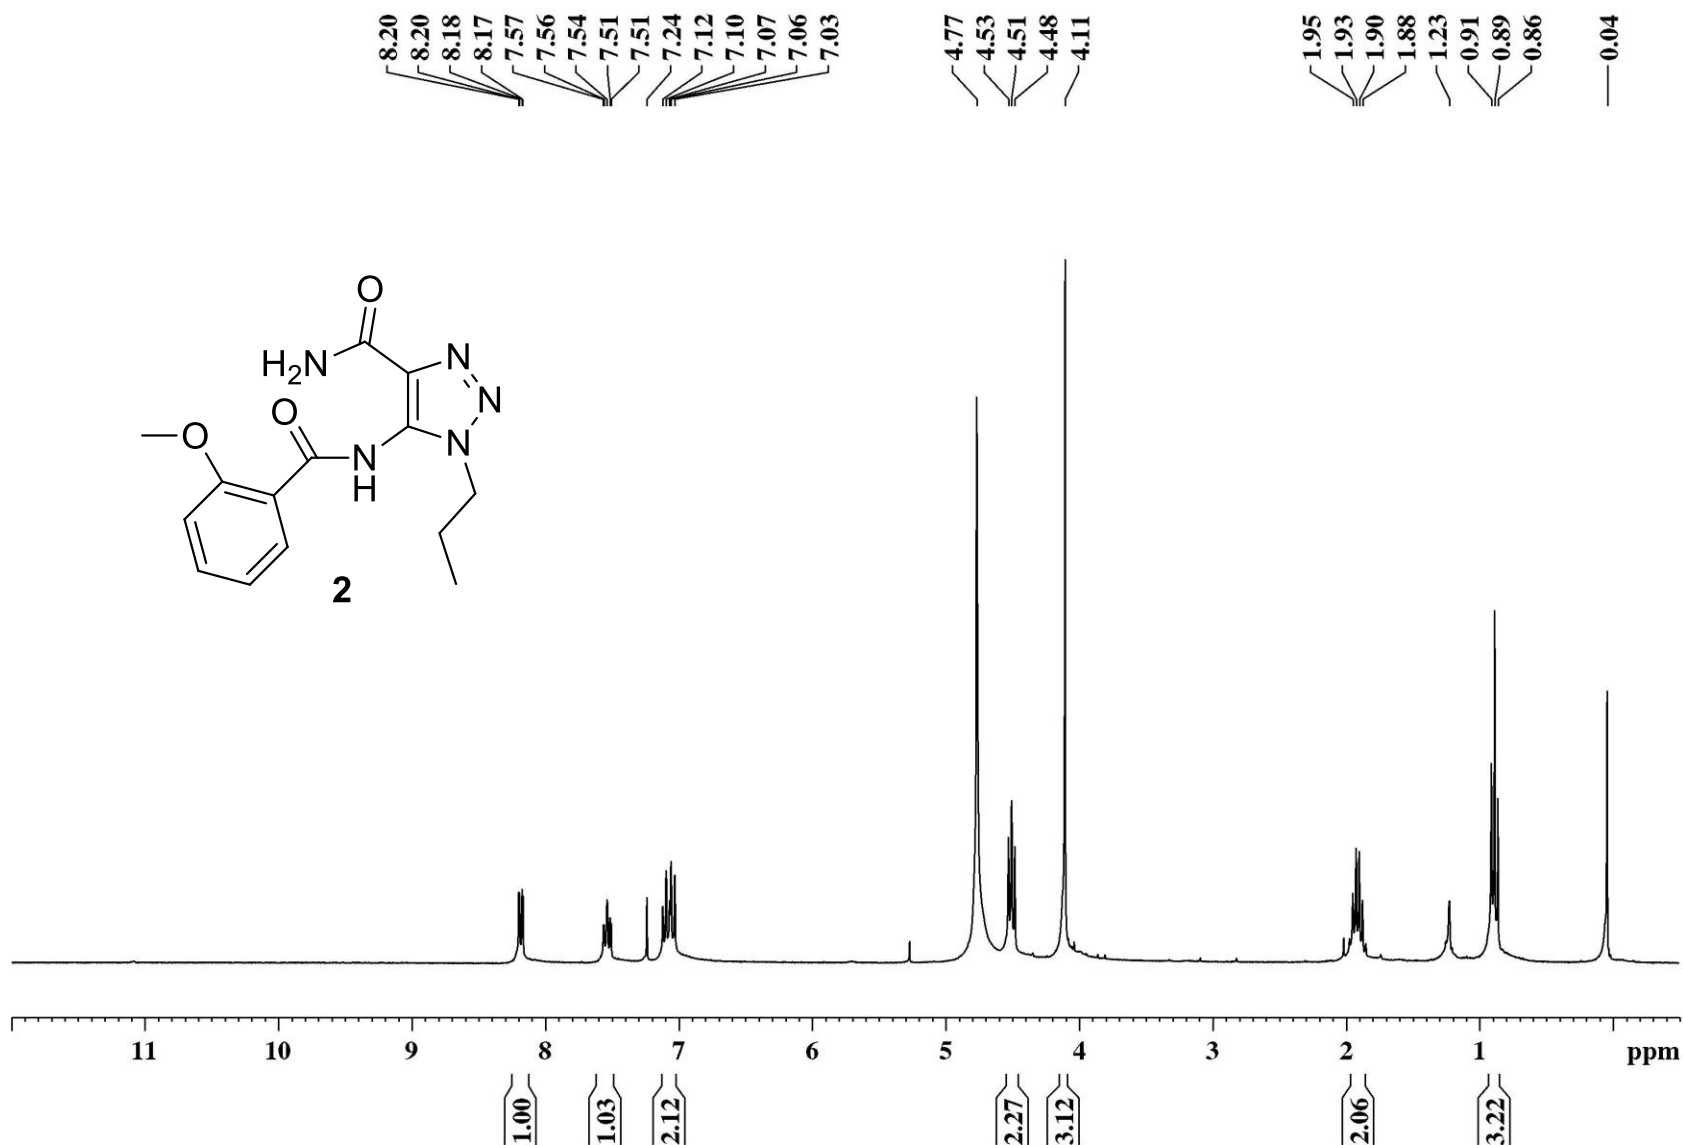

<sup>1</sup>H NMR of compound **2** + D<sub>2</sub>O (300 MHz CDCl<sub>3</sub>)

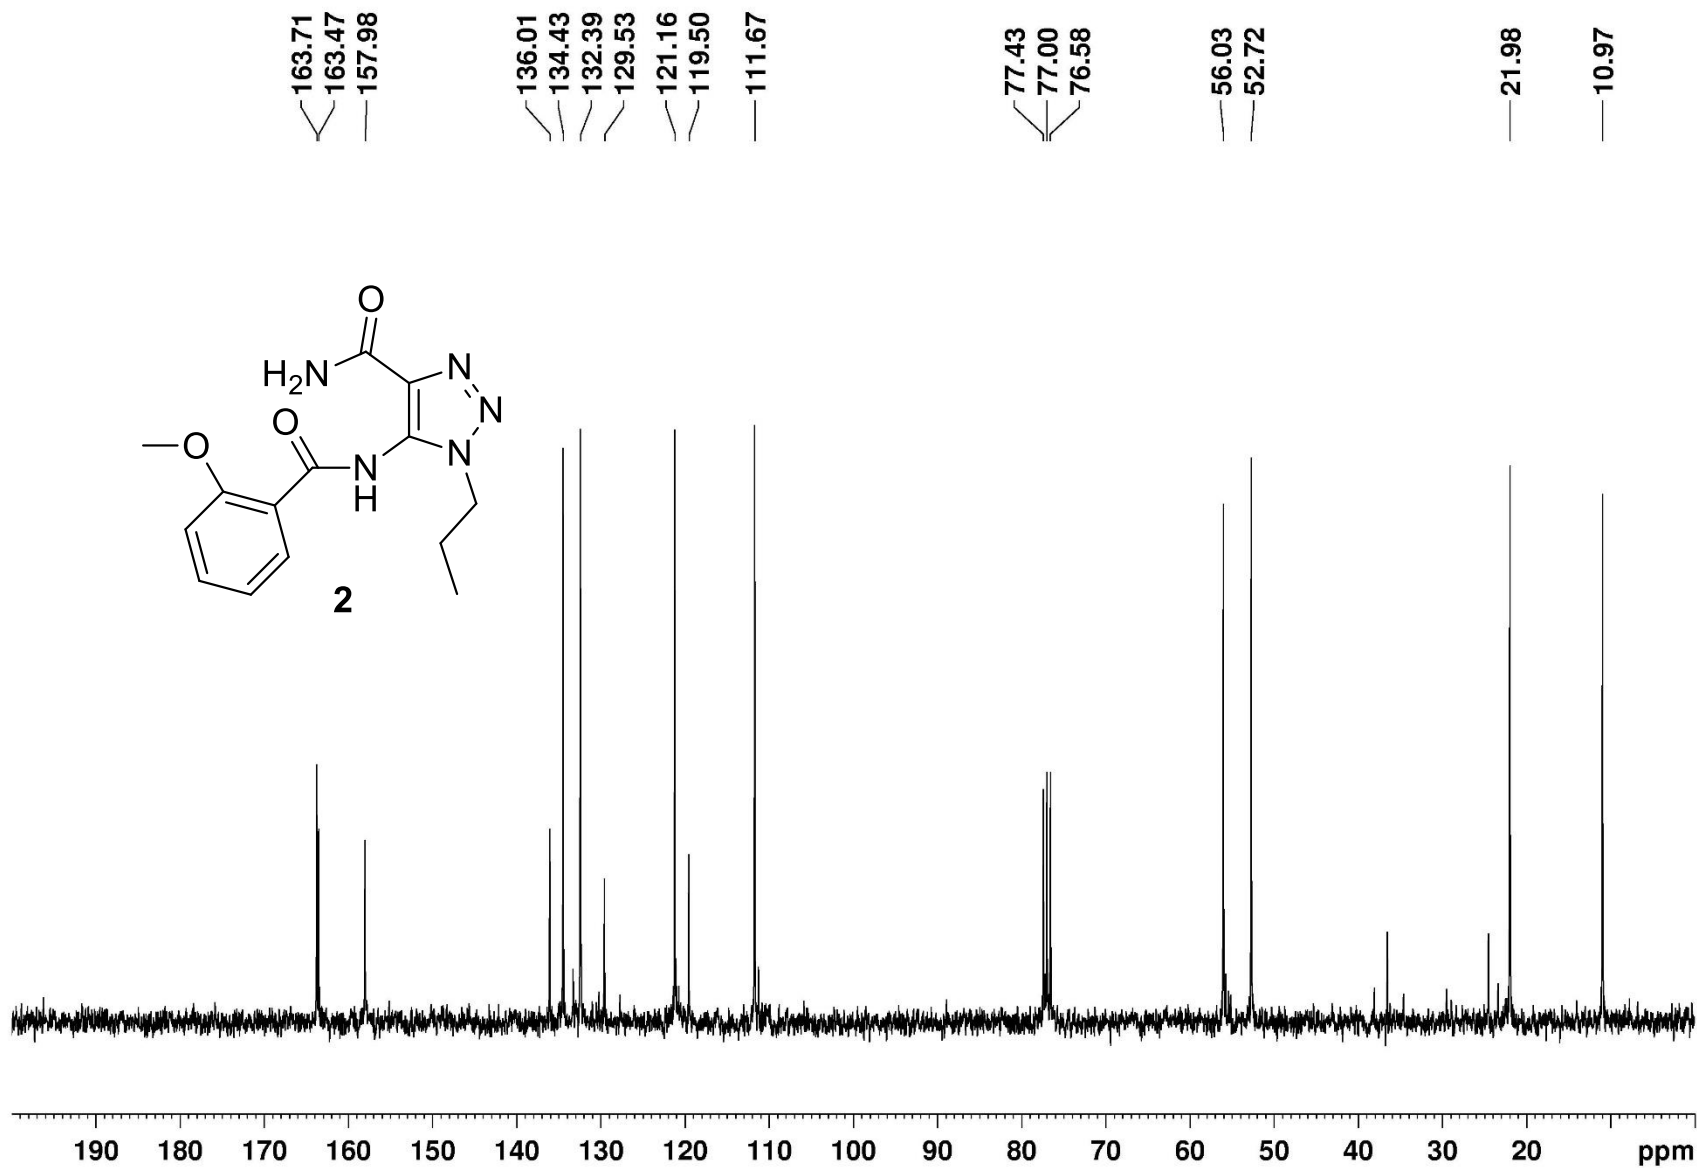

$^{13}\text{C}\{^1\text{H}\}$  NMR of compound **2** (75 MHz,  $\text{CDCl}_3$ )

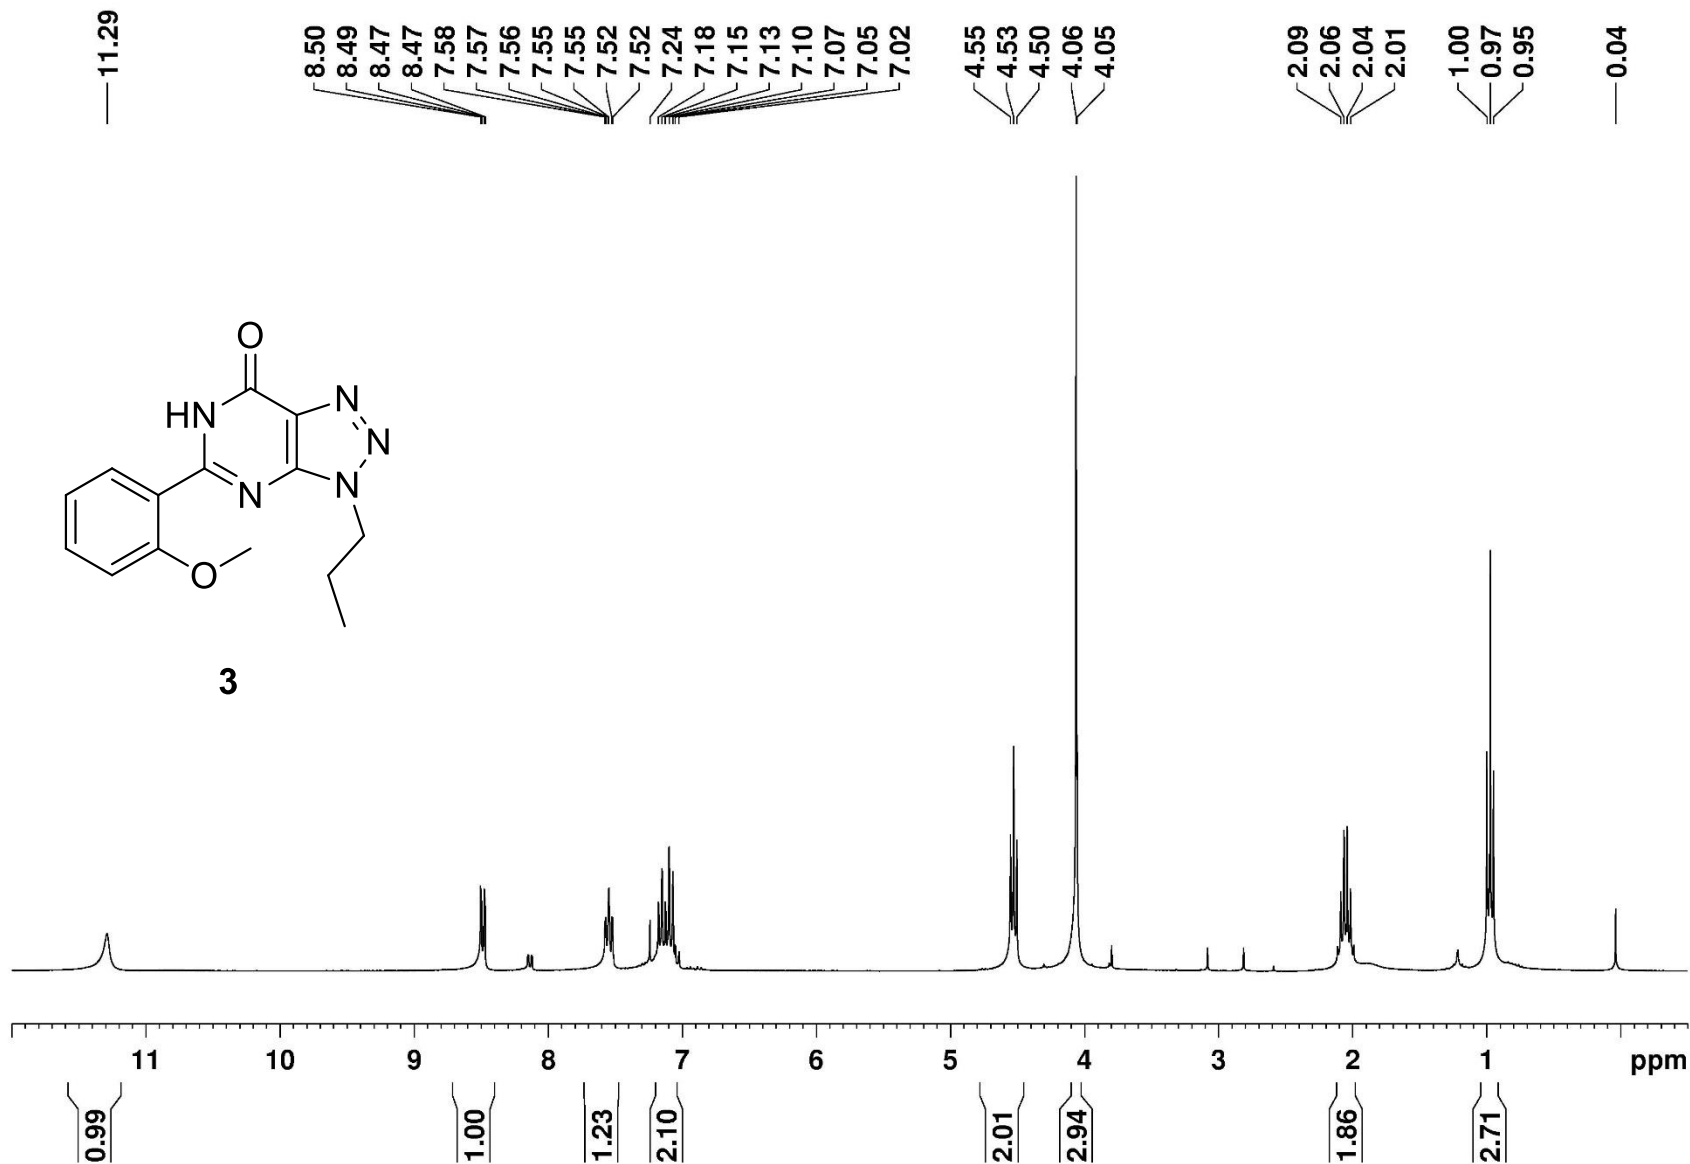

<sup>1</sup>H NMR of compound **3** (300 MHz CDCl<sub>3</sub>)

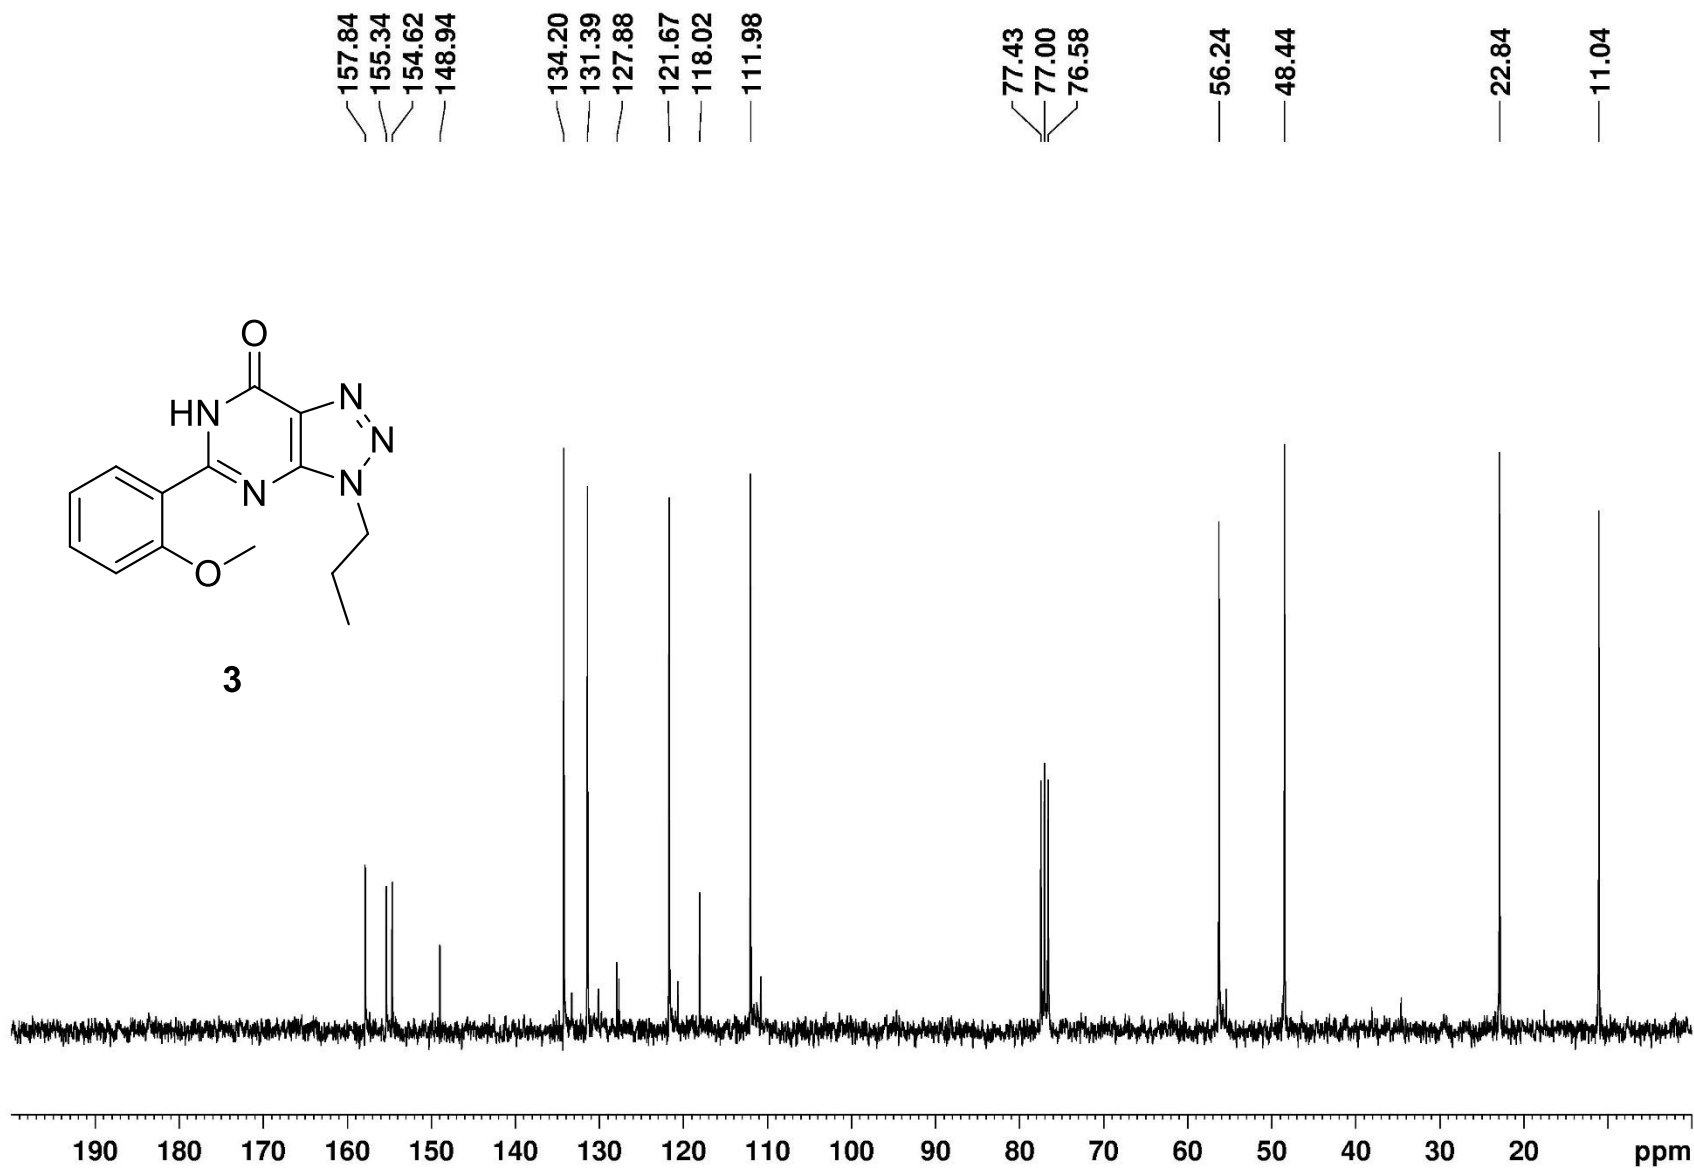

<sup>13</sup>C {<sup>1</sup>H} NMR of compound **3** (75 MHz, CDCl<sub>3</sub>)

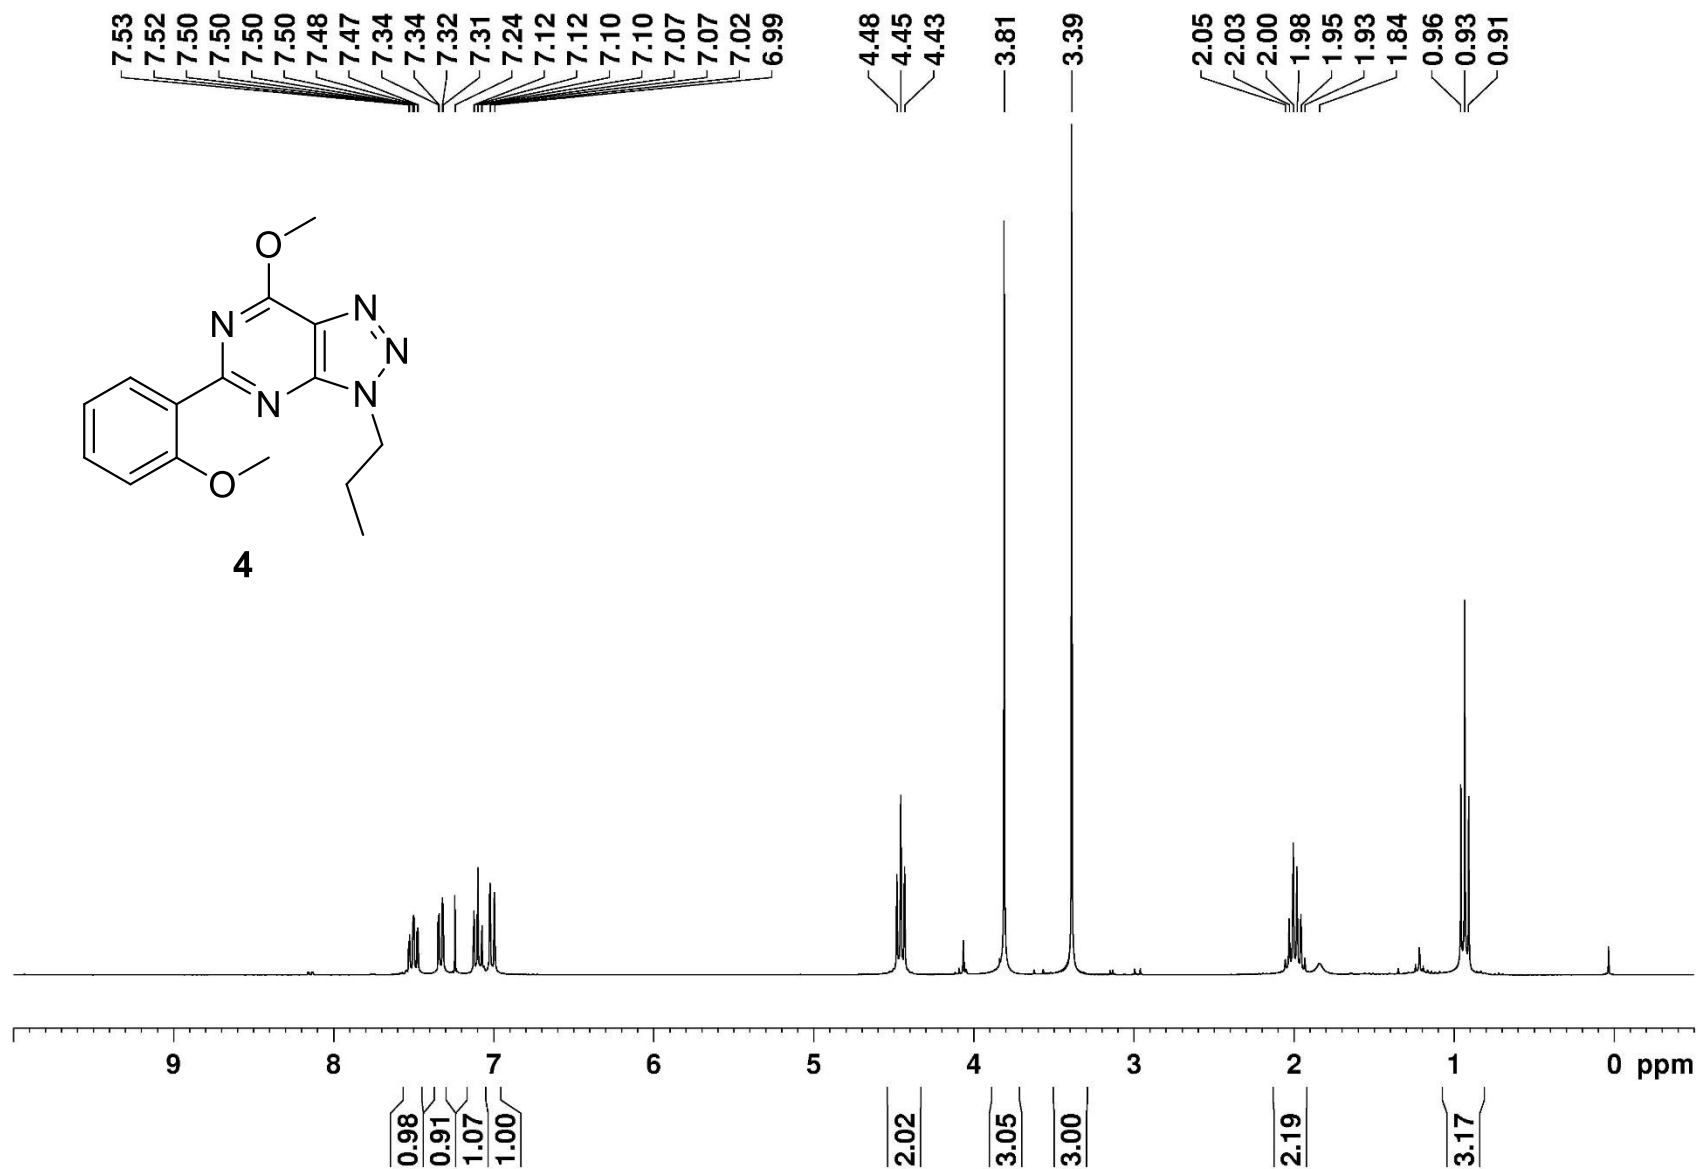

<sup>1</sup>H NMR of compound **4** (300 MHz CDCl<sub>3</sub>)



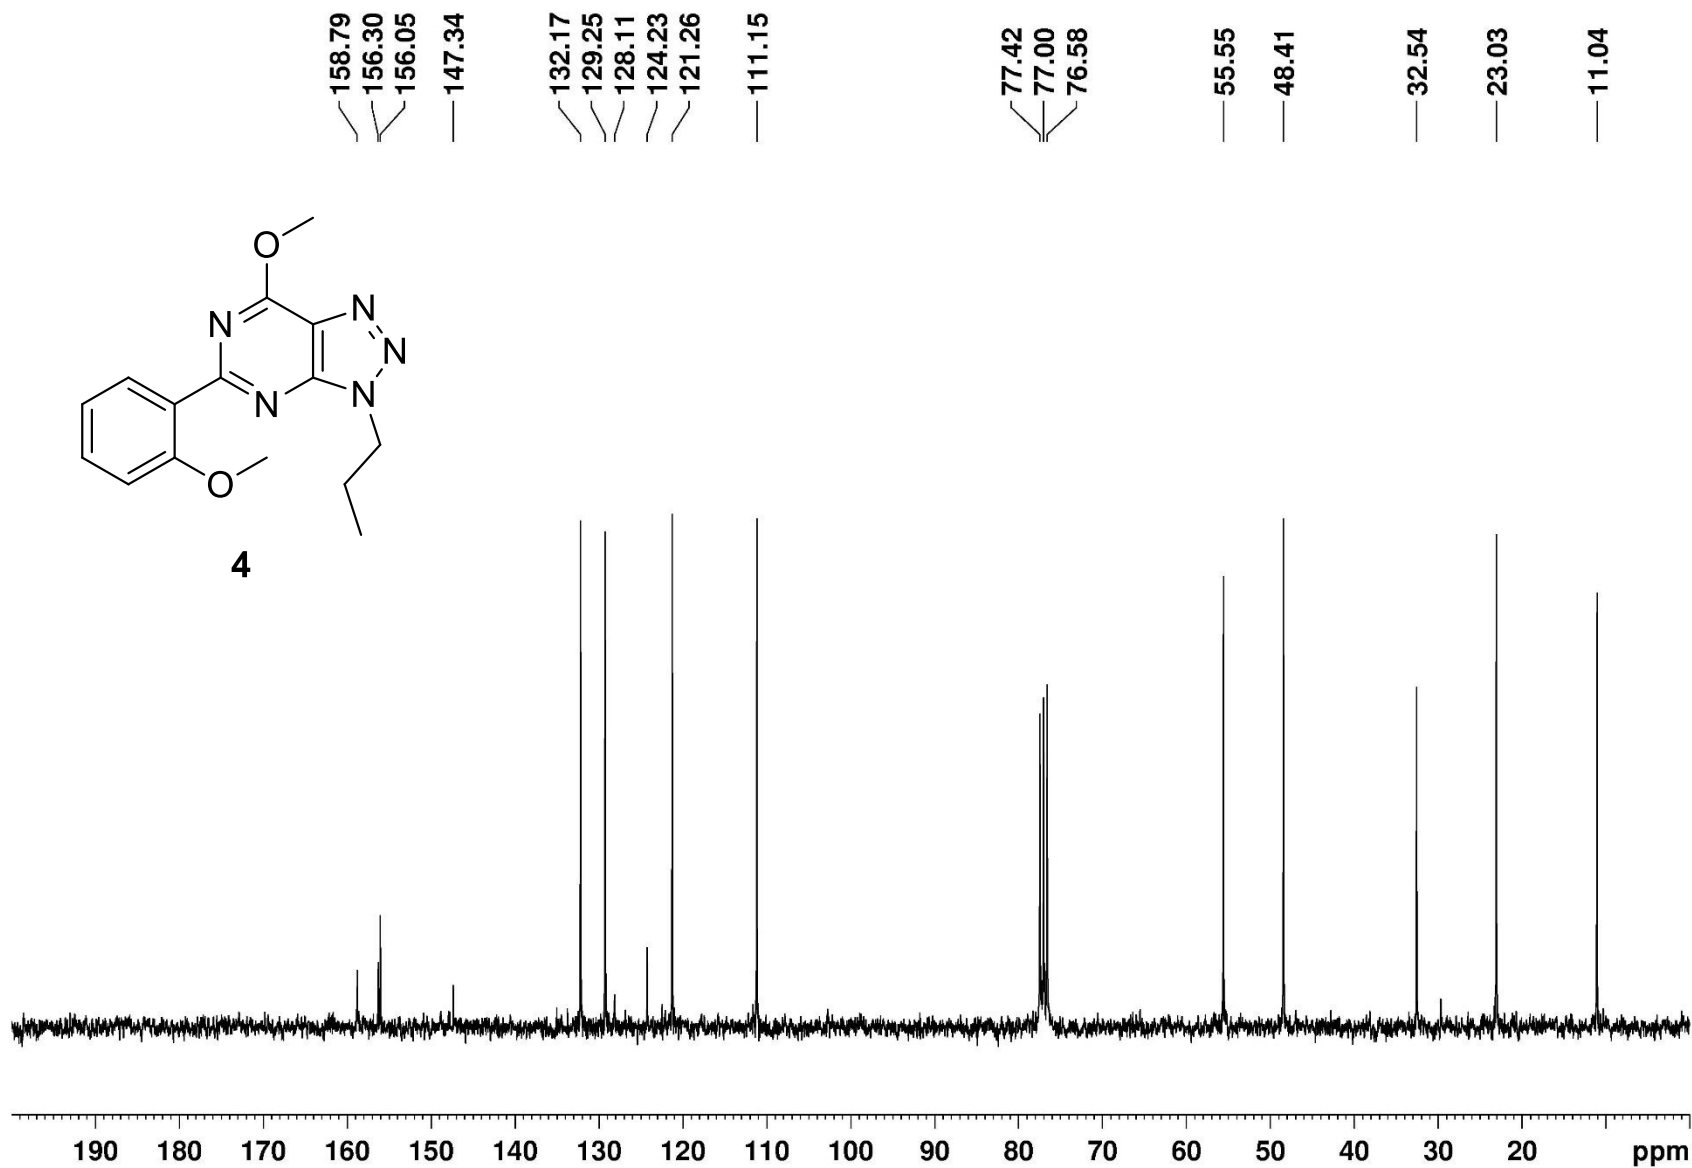

$^{13}\text{C}\{^1\text{H}\}$  NMR of compound **4** (75 MHz  $\text{CDCl}_3$ )

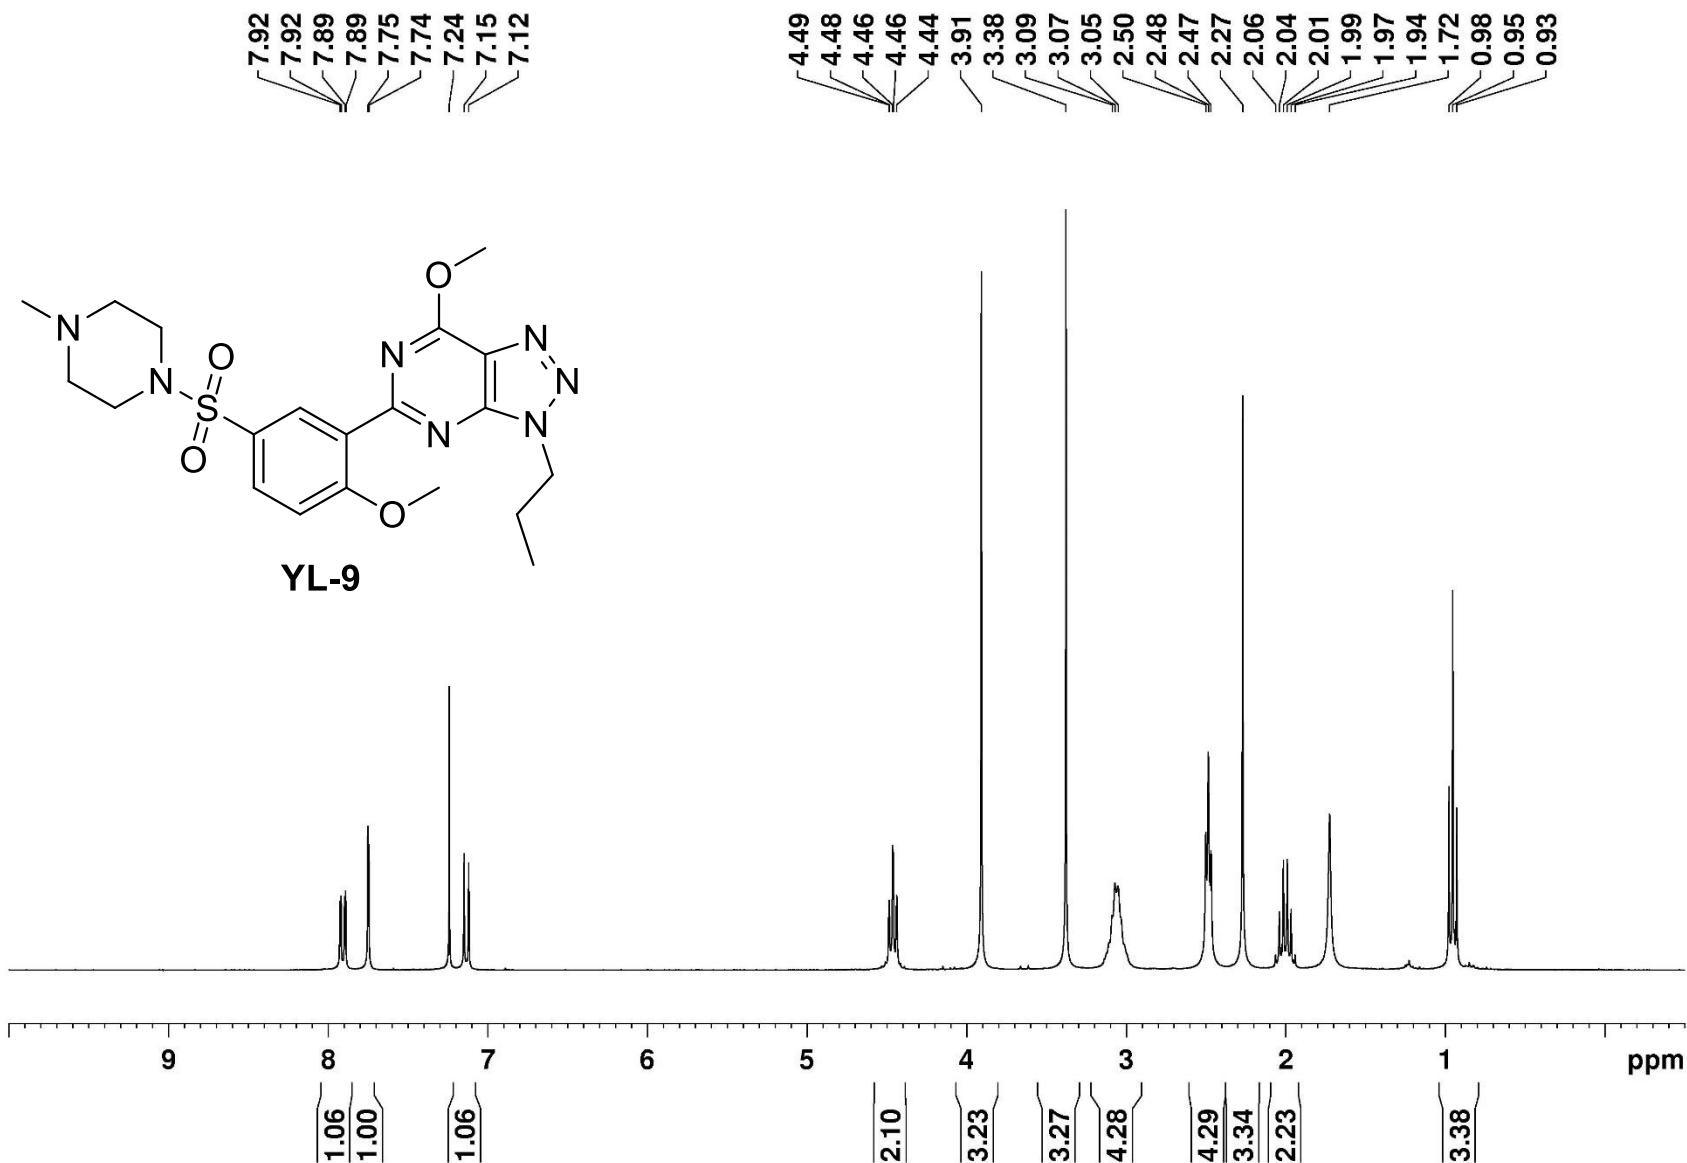

$^1\text{H}$  NMR of compound **YL-9** (300 MHz  $\text{CDCl}_3$ )

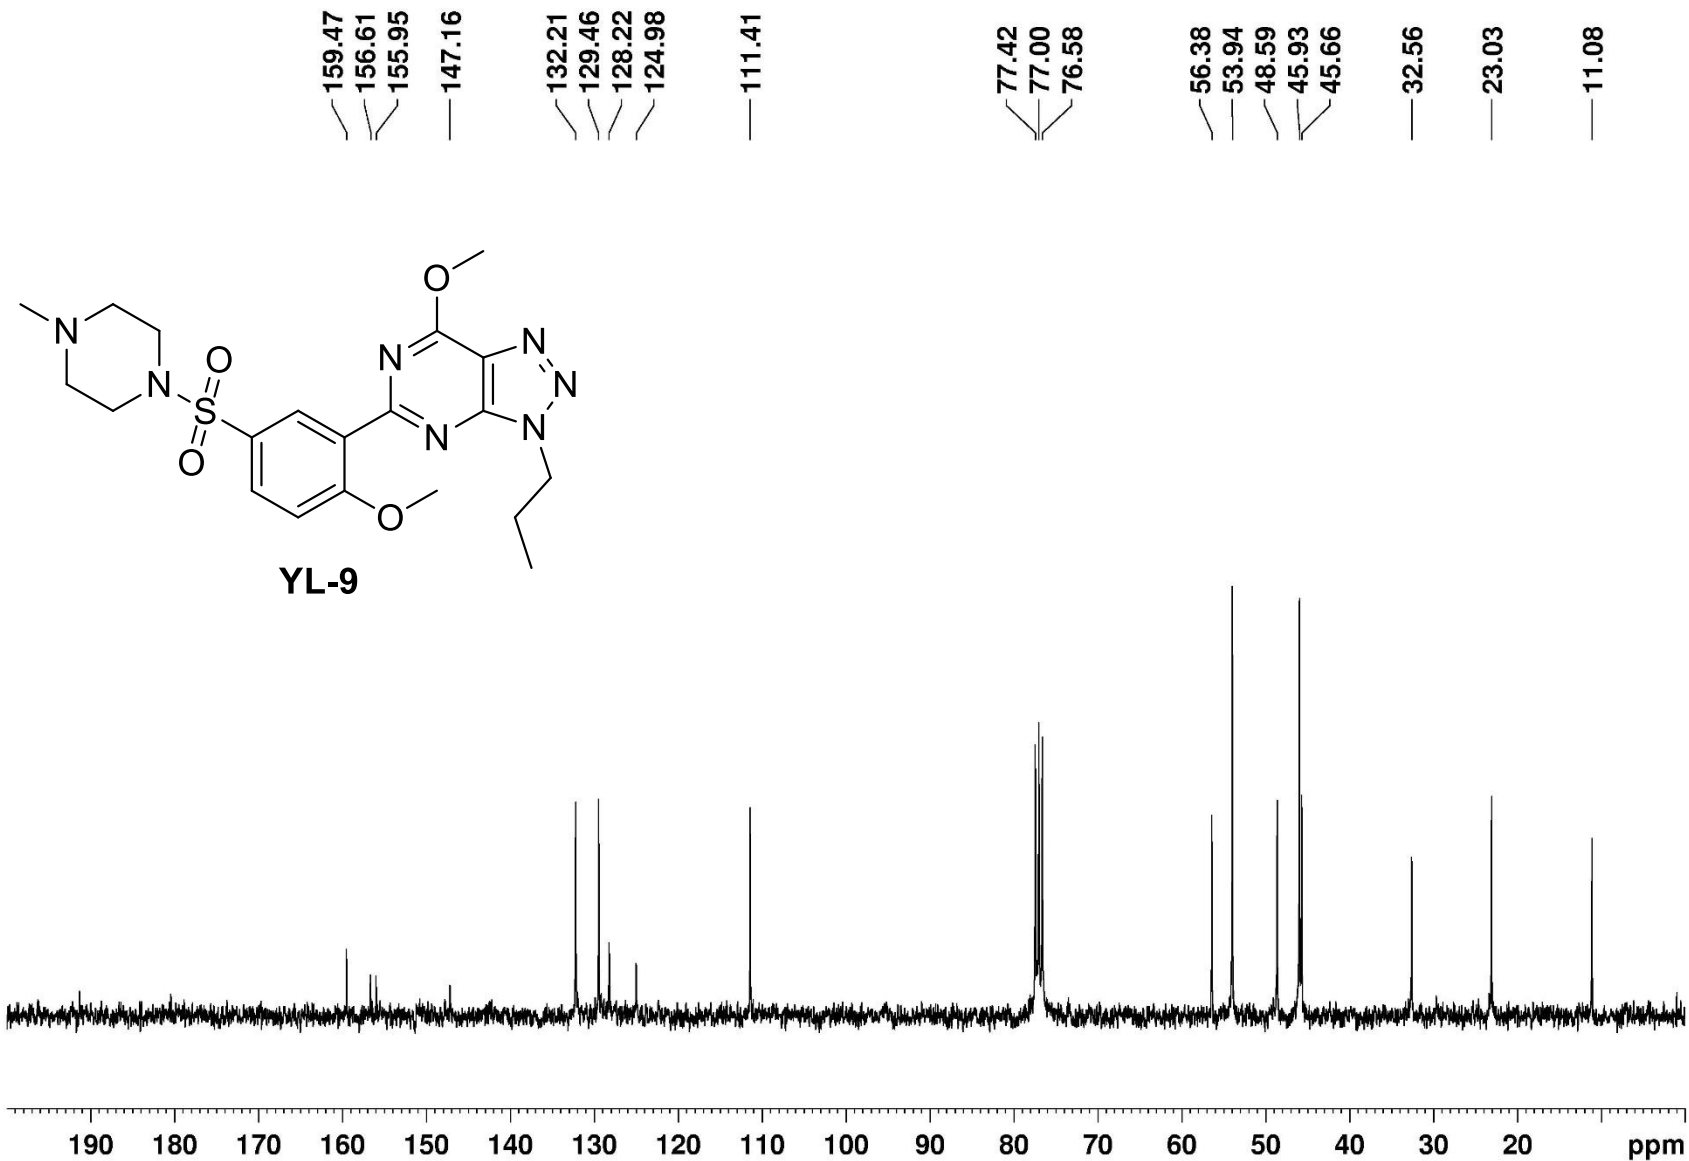

$^{13}\text{C}\{^1\text{H}\}$  NMR of compound **YL-9** (75 MHz  $\text{CDCl}_3$ )
